# Supplementary material for: Protein phosphatase 5 is a negative regulator of separase function during cortical granule exocytosis inC. elegans
Source: Oxford University Press journal article supplement (doi:10.1242/jcs.073379), 2011-08-30
Supplement: jcs073379tables1.pdf [file jcs073379tables1.pdf]

**Table S1. Suppression of *sep-1*(*e2406ts*) but not *sep-1*(*ax110*) by *pph-5* mutants is semi-dominant**

| <b>Strain @ 24°C (unless otherwise noted)</b>         | <b>Total Embryos</b> | <b>% Hatch</b> |
|-------------------------------------------------------|----------------------|----------------|
| 1. <i>ax110; pph-5</i> (+)                            | 653                  | 0.0            |
| 2. <i>ax110; pph-5</i> ( <i>av101</i> )               | 428                  | 99.5           |
| 3. <i>ax110; pph-5</i> ( <i>av101</i> )/+             | 3478                 | 0.0            |
| 4. <i>ax110; pph-5</i> ( <i>tm2979</i> )              | 808                  | 99.3           |
| 5. <i>ax110; pph-5</i> ( <i>tm2979</i> )/+            | 3044                 | 0.0            |
| 6. <i>e2406ts; pph-5</i> (+) @ 20°C                   | 221                  | 0.0            |
| 7. <i>e2406ts; pph-5</i> ( <i>av101</i> ) @ 20°C      | 3005                 | 95.3           |
| 8. <i>e2406ts; pph-5</i> ( <i>av101</i> )/+ @ 20°C    | 3552                 | 9.0            |
| 9. <i>e2406ts; pph-5</i> ( <i>tm2979</i> ) @ 20°C     | 797                  | 97.9           |
| 10. <i>e2406ts ; pph-5</i> ( <i>tm2979</i> )/+ @ 20°C | 4039                 | 1.0            |

Homozygous suppressed hermaphrodites (*sep-1*; *unc-119*; *pph-5*) were mated with *sep-1*/hT2; *him-8* males at the restrictive temperature. Non-Unc non-GFP (non-hT2) cross progeny were picked to individual plates at the L4 stage and the embryonic lethality of their entire brood was determined. Data for lines 6 and 9 are from Table 1.
